# Supplementary material for: Biomarker identification and pathway analysis of Astragalus membranaceus and Curcuma zedoaria couplet medicines on adenine-induced chronic kidney disease in rats based on metabolomics
Source: Front Pharmacol. 2023 Apr 6;14:1103527. doi: 10.3389/fphar.2023.1103527 (PMC10116179; doi:10.3389/fphar.2023.1103527)
Supplement: Supplementary file 6 [file Table1.XLSX]

## Sheet: Sheet1
NO	MS2 name	rt	mz	VIP	P-VALUE	FOLD CHANGE
1	Pyridine	408.678	80.05	1.42136	5.42468e-05	0.337237
2	Hypoxanthine	689.679	137.046	1.00227	0.00508593	0.602468
3	Adenine	399.384	136.062	1.24939	0.00414458	0.741137
4	Cytosine	223.436	112.051	1.4598	1.93483e-05	0.444427
5	Pentanenitrile	176.762	84.0812	1.49403	0.00672762	0.171653
6	2-Hydroxypyridine	26.0996	96.0448	1.02949	0.0182994	1.66734
7	1-Pyrroline	327.431	70.0657	1.42618	2.90341e-05	0.449191
8	Inosine	231.412	269.087	1.44043	1.13348e-05	0.411258
9	Betaine	288.414	118.086	1.16953	0.0122558	0.602613
10	2,5-Dimethyl-3-propylpyrazine	146.934	151.123	1.54163	0.000440785	0.140771
11	Cytarabine	255.861	244.093	1.00615	0.00722531	0.655994
12	Niacinamide	510.855	123.055	1.56755	9.86458e-06	0.084566
13	beta-Alanine	362.476	90.0554	1.18344	0.000990695	0.614875
14	D-Proline	342.737	116.071	1.27371	0.000538416	0.575923
15	1H-Pyrrole-2-carboxaldehyde	395.823	96.0448	1.52709	0.0019684	0.211871
16	(R)-mandelic Acid	70.6222	135.044	1.28731	0.00149312	0.285715
17	6-Methyladenine	255.822	150.077	1.13112	0.00379719	2.49685
18	Adenosine	182.391	268.104	1.2922	0.0107457	0.521764
19	Pyrrolidonecarboxylic acid	408.678	130.05	1.20819	0.000779715	0.56758
20	L-Carnitine	371.669	162.112	1.40882	2.83669e-05	0.607796
21	N6-Methyladenosine	305.617	282.119	1.08024	0.0102752	1.68667
22	L-Threonine	368.237	120.066	1.51168	0.000416847	0.462988
23	Poly-g-D-glutamate	316.312	519.192	1.19775	0.00790589	0.445698
24	Trigonelline	303.377	138.055	1.06403	0.0158221	1.63439
25	L-Phenylalanine	276.964	166.086	1.32304	9.05908e-05	0.457778
26	Adenosine 2'-phosphate	444.762	348.07	1.37483	0.0194241	0.236541
27	1-Methyladenosine	130.514	282.119	1.02478	0.0023233	0.495299
28	Uridine	175.483	245.077	1.47786	0.00149687	0.455544
29	Glycine	379.861	76.0399	1.17942	0.00167711	0.4575
30	3-Isoxazolidinone	393.542	88.0398	1.30253	0.000106282	0.363503
31	Solavetivone	69.0548	219.174	1.58491	0.00183459	367.17
32	Oleamide	224.582	282.279	1.37286	0.000138779	0.384949
33	Nicotinic acid	341.575	124.04	1.47292	0.00359933	0.333102
34	Phosphoric acid	447.119	98.9846	1.52631	3.14054e-05	0.0781984
35	Guanine	212.013	152.057	1.54683	0.0022882	58.7638
36	L-Isoleucine	292.995	132.102	1.22818	0.000144929	0.53534
37	Thiiraneacetonitrile	244.087	100.022	1.14833	0.011186	1.85845
38	5-Methylcytidine	242.937	258.108	1.32598	0.0001064	0.397572
39	1H-Indole-2,3-dione	175.616	148.039	1.34614	0.0128757	0.517937
40	Nervonyl carnitine	25.2886	102.128	1.28339	0.00563754	0.673485
41	Nicotinamide ribotide	489.664	335.063	1.54927	0.000145382	0.0294569
42	1-deoxy-1-(N6-lysino)-D-fructose	417.732	134.045	1.44951	0.000293276	0.231366
43	1-Methylhypoxanthine	93.7783	151.061	1.56633	1.41829e-07	2.52054
44	2-Methyl-3-(2-methylpropyl)pyrazine	70.5614	151.123	1.40098	0.00558558	0.310699
45	Betonicine	271.481	160.097	1.44065	0.00253522	3.34844
46	L-Histidine	527.317	156.077	1.4671	1.47015e-05	0.548206
47	2-Propylpiperidine	222.276	128.143	1.43462	0.000198442	0.744737
48	Trehalose	415.301	365.105	1.36901	0.000432477	0.337957
49	Methylpyrazine	117.72	95.0607	1.38343	0.00149443	0.378655
50	3-Mercapto-2-methyl-1-butanol	368.224	121.069	1.37118	0.00971451	0.543541
51	3,3,5-triiodo-L-thyronine-beta-D-glucuronoside	281.756	132.102	1.29676	0.000161544	0.508964
52	L-Lysine	542.551	147.113	1.442	7.63326e-06	0.362422
53	2,6-Dimethylpyrazine	375.178	109.076	1.36193	0.00215768	0.218736
54	3-Methylcytosine	242.937	126.066	1.2814	0.000243599	0.45787
55	6-Deoxyfagomine	219.986	132.102	1.1416	0.0254982	0.417781
56	4-Hydroxybenzaldehyde	320.629	123.044	1.23363	0.000128401	0.371524
57	Creatine	367.001	132.077	1.12271	0.0113251	0.805903
58	Zymonic acid	181.048	159.028	1.35444	0.00104469	0.556454
59	2-Acetyl-3,6-dimethylpyrazine	141.288	151.087	1.48689	0.00416831	0.219831
60	1-Methylhistamine	371.699	126.103	1.3996	0.000149329	0.263774
61	4,5-Dimethyl-2-heptyloxazole	94.6381	196.17	1.44783	0.00740986	0.058934
62	Beta-Aminopropionitrile	282.693	71.0609	1.03554	0.0434717	0.70429
63	3-Amino-2-piperidone	524.978	115.087	1.45812	0.00226157	0.342393
64	Riboflavin	232.543	377.145	1.0545	0.00349442	0.572209
65	L-Glutamic acid	500.309	148.06	1.35968	0.000468197	0.644753
66	Piperidine	282.524	86.0969	1.27745	0.000180856	0.528513
67	D-Xylitol	223.363	153.077	1.43485	7.95844e-05	0.46067
68	D-Ornithine	581.041	133.097	1.2932	0.0476598	0.286181
69	L-Asparagine	393.62	133.061	1.23642	0.000466203	0.470108
70	Betaine aldehyde	334.431	102.092	1.39459	0.000823363	0.489468
71	Dimethylarsinate	414.131	138.974	1.45378	0.0001	0.230339
72	Trimethylamine N-oxide	345.091	76.0762	1.30953	0.00111636	2.03764
73	4-Hydroxy-1-(3-pyridinyl)-1-butanone	345.103	166.086	1.20702	0.0151101	0.444437
74	Phenylacetylglycine	201.696	194.081	1.36821	0.0138627	5.00728
75	(Â±)-erythro-Isoleucine	312.617	132.102	1.3553	0.000456744	0.492981
76	Imidazoleacetic acid riboside	377.529	259.092	1.1209	0.00717112	2.29331
77	(2E,11Z)-5-[5-(Methylthio)-4-penten-2-ynyl]-2-furanacrolein	301.069	233.063	1.49383	0.00947663	0.0659223
78	Propionylcarnitine	299.916	218.139	1.38474	0.000135172	0.300023
79	L-Proline	376.311	116.071	1.28869	0.00022371	0.444137
80	Citrulline	408.516	176.103	1.20738	0.00808348	1.81329
81	Pantothenic acid	281.718	220.118	1.49643	1.14396e-05	0.305119
82	1,2,5,6-Tetrahydro-4H-pyrrolo[3,2,1-ij]quinolin-4-one	26.1207	174.091	1.13301	0.0107025	2.20576
83	2-Pyrrolidinone	52.3218	100.076	1.1721	0.0227644	0.520534
84	L-Targinine	526.145	189.135	1.47086	5.48309e-05	0.390155
85	Prolylhydroxyproline	399.281	229.118	1.47337	0.015041	0.0830523
86	Tetramethylpyrazine	86.7131	137.107	1.30929	0.00217115	0.346727
87	Cytidine 2',3'-cyclic phosphate	335.706	306.048	1.46073	0.00572364	0.168912
88	2-Acetyl-3-ethylpyrazine	261.666	151.087	1.37197	8.77228e-05	0.500704
89	N-Ornithyl-L-taurine	235.965	240.102	1.42157	0.00222998	0.237358
90	NAD	448.294	664.116	1.55416	0.000443149	0.0460869
91	N-Acetylglutamine	357.203	189.082	1.29969	0.0371572	0.373416
92	Pyrimidine	116.704	81.0452	1.50422	0.00404558	0.245893
93	Acetylhydrazine	342.347	75.0559	1.53309	8.55469e-06	0.574343
94	Aspartyl-Glutamine	404.074	262.103	1.10916	0.0180041	1.40038
95	L-Arginine	538.422	175.119	1.23269	0.00169737	0.673504
96	L-Cyclo(alanylglycyl)	378.637	129.066	1.39399	0.00551481	0.323276
97	Thiamine monophosphate	516.701	345.077	1.14058	0.00180294	0.510821
98	Thiomorpholine 3-carboxylate	379.8	148.043	1.50674	2.13314e-05	0.408811
99	S-Adenosylhomocysteine	400.546	385.128	1.47036	3.43451e-05	0.294158
100	Validamycin A	528.512	498.219	1.31879	0.000392978	0.372628
101	apo-[3-methylcrotonoyl-CoA:carbon-dioxide ligase (ADP-forming)]	331.583	174.124	1.13147	0.00763512	1.84036
102	LysoPE(16:1(9Z)/0:0)	225.704	452.276	1.26825	0.0032915	0.426178
103	Guanidoacetic acid	372.825	118.061	1.4652	0.00227297	0.285404
104	Gynocardin	317.176	304.1	1.51925	0.000375989	0.250806
105	D-4'-Phosphopantothenate	453.002	300.084	1.49168	0.000337118	0.0981469
106	Glycerol 3-phosphate	447.124	173.021	1.5536	4.35467e-05	0.0627251
107	Aminoadipic acid	306.868	162.076	1.11617	0.0145054	0.617801
108	Dimethylethanolamine	284.005	90.0918	1.53337	1.40463e-06	0.377722
109	Aspartame	314.886	295.126	1.09982	0.0374959	0.489589
110	D-1-Piperideine-2-carboxylic acid	547.353	128.071	1.42224	0.000399816	0.455259
111	Protein serine	392.464	106.05	1.36108	4.0788e-05	0.363276
112	4-Acetylimidazo[4,5-c]pyridine	151.676	162.066	1.05765	0.000183254	0.4187
113	Cytidine 2'-phosphate	449.406	324.059	1.28192	0.00440369	0.328749
114	Tyrosyl-Alanine	262.272	253.118	1.06577	0.0154509	2.42567
115	Racemethionine	302.163	150.058	1.28878	0.000111803	0.491319
116	1-Aminocyclopropanecarboxylic acid	408.627	102.055	1.21855	0.000866819	0.552393
117	LysoPE(0:0/18:3(6Z,9Z,12Z))	224.584	476.274	1.43501	9.32081e-05	0.320788
118	Palmitoleoyl Ethanolamide	93.2686	298.274	1.1971	0.00269186	0.515488
119	Xanthosine	232.547	285.082	1.0746	0.00963733	1.69109
120	2-O-Acetylarbutin	210.897	315.108	1.31503	0.000961986	0.430091
121	N5-(4-Methoxybenzyl)glutamine	387.853	267.134	1.25241	0.00196162	0.417642
122	3-Methylglutarylcarnitine	361.256	290.16	1.11746	0.0312249	0.202473
123	4-Hydroxy-1H-indole-3-acetonitrile	47.758	173.071	1.30824	0.00223293	0.537641
124	Deoxyadenosine monophosphate	435.264	332.075	1.39964	0.00715755	0.258288
125	Quinaprilat	527.328	411.187	1.10324	0.00498343	0.399832
126	Ornithine	542.664	133.097	1.39749	0.00811542	0.363566
127	N-Acetylputrescine	357.815	131.118	1.22577	0.00571713	2.16522
128	N6-Acetyl-L-lysine	364.783	189.123	1.22927	0.000967204	0.449135
129	NADP	503.888	744.081	1.53014	0.000104555	0.111183
130	2-Aminoacrylic acid	444.8	88.0398	1.26855	1.07726e-05	0.101541
131	5-(2-Hydroxyethyl)-4-methylthiazole	379.805	144.048	1.27218	0.00336037	0.396555
132	FAD	408.627	786.163	1.51821	3.04475e-06	0.20909
133	Pyridinoline	530.765	429.197	1.27759	0.00146463	0.393365
134	Beta-Guanidinopropionic acid	376.364	132.077	1.27623	0.0254192	0.567335
135	Gamma-Glutamyl-Se-methylselenocysteine	475.526	313.029	1.43797	0.000981247	0.184478
136	Benzaldehyde	245.179	107.049	1.14649	0.0102358	0.729707
137	Deoxycytidine	223.439	228.098	1.43872	2.62673e-05	0.431364
138	Dodecanoylcarnitine	210.761	344.279	1.28934	0.00108067	0.376561
139	2,5-Diethyl-3,6-dimethylpyrazine	67.1312	165.139	1.28166	0.00151535	0.332637
140	Carnosine	438.913	227.114	1.17528	0.0462806	0.170872
141	Linoleamide	93.1612	280.263	1.22323	0.00230399	0.522066
142	Ecgonine	239.442	186.112	1.49118	0.00314649	7.65766
143	Pyridoxamine	320.629	169.097	1.49613	0.0115271	0.149897
144	2-Amino-3-methylbenzoate	190.138	152.071	1.35132	0.00142669	0.529651
145	1-Methyl-1,3-cyclohexadiene	31.8564	95.0859	1.11832	0.00813109	0.781941
146	Octadecanamide	135.92	284.294	1.00083	0.00545118	0.62126
147	Phenylalanyl-Glycine	247.6	223.108	1.39412	0.00404259	5.31605
148	p-Mentha-1,3,8-triene	31.8839	135.117	1.22217	0.00386676	0.556688
149	Marshdine	362.427	300.089	1.27086	0.00689396	0.444501
150	Squamolone	186.77	129.066	1.34185	0.0116559	0.378647
151	2-Hydroxyphenylacetic acid O-b-D-glucoside	226.834	315.108	1.17262	0.0320098	0.291574
152	Lysyl-Arginine	590.043	303.214	1.08949	0.027612	0.540901
153	Hydratopyrrhoxanthinol	423.534	589.356	1.16333	0.0159495	0.472772
154	Butyrylcarnitine	279.274	232.154	1.16788	0.00245244	0.466427
155	L-2-Amino-5-hydroxypentanoic acid	367.077	134.081	1.10731	0.0138469	0.814389
156	Guanosine	281.535	284.098	1.39524	0.00371298	0.288571
157	Moracin G	117.695	309.109	1.34224	0.00243815	0.411527
158	Protoporphyrin IX	189.083	563.264	1.0764	0.038584	0.407593
159	DIMBOA-Glc	341.552	374.105	1.08888	0.0215258	0.443092
160	Leucyl-Valine	392.464	231.17	1.10261	0.0101065	0.524009
161	Methoxypyrazine	231.414	111.056	1.11593	0.0460557	0.25958
162	Aspartyl-Arginine	503.872	290.145	1.04554	0.0201355	0.597724
163	LysoPE(0:0/20:4(5Z,8Z,11Z,14Z))	215.455	502.292	1.43681	4.48083e-06	0.360952
164	Medicanine	79.8962	160.097	1.2641	0.000526194	2.34402
165	4-Pyridoxolactone	125.913	166.05	1.49077	4.78953e-06	0.39634
166	1,3-Dimethyluracil	320.168	141.066	1.3866	6.45367e-05	3.59825
167	Fructosamine	451.754	180.088	1.40627	1.02251e-05	0.26419
168	myo-Inositol	317.125	203.053	1.36049	0.000301513	0.162911
169	Nicotinic acid mononucleotide	341.55	256.081	1.13888	0.00943343	0.480101
170	L-Tyrosine	320.614	182.081	1.23111	0.000250688	0.392913
171	Imidazoleacetic acid ribotide	481.459	339.058	1.42972	0.0106659	0.12024
172	2-Methylbutyroylcarnitine	264.041	246.17	1.48719	0.00263525	0.180165
173	Saccharopine	523.797	277.139	1.51927	0.00046042	0.328185
174	Tamoxifen N-oxide	442.394	388.23	1.18836	0.00354005	0.515824
175	Arborinine	335.183	286.107	1.47726	0.00037079	0.222168
176	Epidermin	362.472	262.128	1.45663	0.00102306	0.367909
177	Oleoside 11-methyl ester	317.865	405.136	1.03902	0.000643577	3.79417
178	Biotin	208.484	245.095	1.28676	0.000109517	9.12227
179	Deoxypyridinoline	529.706	413.203	1.07437	0.00677217	0.481999
180	Isoleucyl-Alanine	372.861	203.139	1.4111	0.00642014	3.27599
181	Isoleucyl-Glycine	407.372	189.124	1.55608	0.000289652	0.16438
182	Pyrophaeophorbide a	421.131	535.266	1.24705	0.00115961	0.494981
183	6-Chloro-N-(1-methylethyl)-1,3,5-triazine-2,4-diamine	280.512	188.071	1.09995	0.00115047	0.501326
184	S-Acetyldihydrolipoamide-E	493.23	250.093	1.33375	0.00951576	1.46753
185	Koeniginequinone A	422.228	242.079	1.34372	0.00076059	5.62608
186	Valyl-Serine	305.076	205.118	1.18337	0.00638841	0.30439
187	Pisumionoside	419.998	405.209	1.17341	0.00913528	2.59645
188	Trimethylpropylpyrazine	122.362	165.139	1.54293	0.000489852	0.153006
189	Imidazole-4-acetaldehyde	93.6596	111.055	1.50936	0.00482542	0.302505
190	Methyl 2-(10-heptadecenyl)-6-hydroxybenzoate	252.32	389.305	1.24239	0.00298567	1.93603
191	N-Nitroso-pyrrolidine	320.613	101.071	1.23807	0.00194477	1.29251
192	Formiminoglutamic acid	230.285	175.071	1.40899	0.00546912	3.40903
193	N2-gamma-Glutamylglutamine	442.351	276.119	1.11615	0.0390374	2.85157
194	Serylserine	365.923	193.082	1.09517	0.00791218	3.3074
195	1-Tridecene-3,5,7,9,11-pentayne	302.223	163.054	1.29457	0.000628581	2.92678
196	3-Methyl sulfolene	312.595	133.032	1.26153	0.000229383	0.46353
197	Alanyl-Threonine	63.9319	191.103	1.00712	0.0445657	1.55262
198	4',7-Dihydroxy-6-methoxyisoflavan	24.9627	273.112	1.22962	0.0338165	0.227132
199	Gonyautoxin V	457.652	380.095	1.48775	0.00595803	0.0458322
200	5,10-Methylene-THF	451.743	458.178	1.25847	7.9424e-05	0.315254
201	Glycyl-Histidine	394.755	213.098	1.19121	0.0151053	2.05657
202	Tryptophyl-Glycine	195.927	262.118	1.46507	0.0214731	0.0493711
203	Diethyl tartrate	360.06	207.088	1.54605	0.000635777	0.0760341
204	Phlorisobutyrophenone 2-glucoside	92.2096	359.134	1.14595	0.0439205	0.438439
205	Montecristin	174.303	575.503	1.48492	0.000206123	0.333466
206	Debenzoylzucchini factor B	22.66	560.409	1.27795	0.000661468	6.06733
207	Phenylethyl primeveroside	456.459	417.177	1.35387	0.004025	0.280528
208	4-O-alpha-D-Galactopyranosylcalystegine B2	432.969	338.144	1.20534	0.0106527	2.82779
209	Foeniculoside VII	559.091	349.187	1.00264	0.0173855	0.515571
210	Perilloside C	453.768	317.193	1.31707	7.73311e-05	0.477252
211	2-Piperidinone	403.923	100.076	1.34593	0.00284563	0.436438
212	2-Phenylacetamide	320.512	136.076	1.26614	0.000320007	0.402672
213	2-[4-(3-Hydroxypropyl)-2-methoxyphenoxy]-1,3-propanediol 1-glucoside	503.284	419.192	1.47702	0.000883661	0.264769
214	Acetic anhydride	371.671	103.039	1.39027	8.45302e-05	0.593182
215	5-Hydroxy-7-methoxy-2-tritriacontyl-4H-1-benzopyran-4-one	208.561	655.565	1.24765	0.0133571	4.52964
216	Quinone	468.168	109.029	1.10087	0.0379309	2.54422
217	Quindoxin	225.723	163.05	1.36493	0.00274096	0.442201
218	Coenzyme Q9	29.5588	795.628	1.23607	0.001107	0.483288
219	(3xi,6xi)-Cyclo(alanylvalyl)	279.8	171.113	1.4288	0.01594	0.204855
220	L-trans-4-Methyl-2-pyrrolidinecarboxylic acid	542.559	130.086	1.48139	4.1309e-06	0.387255
221	LysoPE(16:0/0:0)	224.576	454.292	1.39176	0.00012086	0.383092
222	5-Methylcytosine	187.921	126.066	1.08302	0.0202042	0.39071
223	LysoPE(0:0/18:2(9Z,12Z))	223.395	478.292	1.36157	0.00374463	0.292335
224	Pterolactam	100.304	116.071	1.29716	0.000312026	1.78665
225	Valyl-Lysine	559.091	246.181	1.16112	0.0119552	1.83699
226	3-Hydroxyisovalerylcarnitine	339.198	262.165	1.52673	0.000422847	0.246138
227	4-Aminobutyraldehyde	74.8885	88.0761	1.27159	0.00692227	0.623604
228	Homocysteine thiolactone	188.536	118.032	1.25005	0.00383391	0.498823
229	LysoPC(P-18:1(9Z))	210.888	506.36	1.24099	0.0223477	2.56864
230	5-Oxo-2(5H)-isoxazolepropanenitrile	180.084	139.05	1.18195	0.00310074	0.657638
231	CDP-Ethanolamine	460.06	447.068	1.08318	0.0270787	0.416445
232	Ganoderic acid F	444.749	571.283	1.46248	0.000365318	0.0641974
233	2-Carboxy-1-[5-(2-carboxy-1-pyrrolidinyl)-2-hydroxy-2,4-pentadienylidene]pyrrolidinium	415.928	309.144	1.43837	0.000820684	0.0493652
234	Camelinin	391.189	262.128	1.4647	0.00193566	0.351781
235	Allantoic acid	276.899	177.062	1.44525	7.29891e-05	0.521045
236	Ginkgolide C	468.387	441.136	1.44616	0.00456328	0.0910884
237	Carboxy-ibuprofen	29.565	237.112	1.11053	0.00500101	0.575345
238	Asparaginyl-Proline	361.236	230.113	1.06144	0.00671296	1.80405
239	2-Benzofurancarboxaldehyde	319.462	147.044	1.35624	0.000172376	0.527359
240	Demethylcalabaxanthone	396.959	379.153	1.47078	0.000966834	0.0255853
241	1-[(5-Amino-5-carboxypentyl)amino]-1-deoxyfructose	496.801	309.165	1.39867	0.0368343	0.0578791
242	3'-Ketolactose	456.11	341.111	1.51099	0.00326792	0.12497
243	4-Trimethylammoniobutanoic acid	224.55	146.118	1.44419	0.000321545	0.402795
244	Avenanthramide L	402.959	326.099	1.49907	0.00107758	0.168136
245	1,4'-Bipiperidine-1'-carboxylic acid	213.154	213.16	1.37471	0.000104236	0.0563035
246	Sphinganine	136.172	302.305	1.11796	0.00101124	0.543925
247	N-Acetoxymethylflindersine	333.349	300.12	1.11685	0.0231958	2.30081
248	Glutaminyllysine	467.259	275.171	1.06069	0.00725158	1.88999
249	cis-5-Tetradecenoylcarnitine	205.736	370.294	1.40317	0.0032715	0.372805
250	SM(d16:1/24:1(15Z))	200.642	785.651	1.14498	0.0114103	0.585711
251	D-Glycero-D-galacto-heptitol	341.515	235.079	1.48408	0.0203034	0.019065
252	Methyl (7Z,9Z,9'Z)-6'-apo-y-caroten-6'-oate	197.256	473.341	1.2431	0.000843398	0.173149
253	Arginyl-Serine	457.639	262.151	1.01585	0.0135163	1.75418
254	1H-Imidazole-1-acetic acid	482.649	186.053	1.16463	0.00796262	0.446315
255	Hydroxyprolyl-Leucine	334.523	245.149	1.3098	0.00106464	0.349039
256	Epicatechin 3-O-(4-methylgallate)	423.548	457.112	1.50322	0.000480246	0.177455
257	(2S,4S)-Pinnatanine	427.089	245.113	1.20228	0.000465093	0.483694
258	PC(20:4(8Z,11Z,14Z,17Z)/20:3(5Z,8Z,11Z))	163.101	832.583	1.43352	0.000156705	0.587667
259	L-Kynurenine	282.825	209.092	1.00905	0.0346218	3.80342
260	2-Hydroxy-7-methoxy-2H-1,4-benzoxazin-3(4H)-one	488.434	196.061	1.45992	0.00149898	7.59886
261	Serylisoleucine	492.081	219.134	1.47584	0.0166529	0.109758
262	Niazirinin	395.873	322.131	1.31287	0.00132978	0.254381
263	Asparaginyl-Arginine	458.835	289.15	1.25559	0.0139173	0.118727
264	SM(d17:1/24:1(15Z))	200.568	799.667	1.39295	0.000349117	0.543831
265	Acetone cyanohydrin	100.673	86.0605	1.3985	4.28032e-05	2.61041
266	[12]-Gingerol	202.888	396.31	1.23122	0.00162068	0.10803
267	LysoPE(22:4(7Z,10Z,13Z,16Z)/0:0)	212.532	530.324	1.46447	0.000842778	4.82582
268	PC(22:6(4Z,7Z,10Z,13Z,16Z,19Z)/22:6(4Z,7Z,10Z,13Z,16Z,19Z))	65.9959	878.568	1.21941	0.00213259	0.0929323
269	SM(d18:0/18:1(9Z))	203.903	731.605	1.05887	0.0138268	1.43785
270	PC(22:5(7Z,10Z,13Z,16Z,19Z)/16:1(9Z))	165.408	806.568	1.5235	0.000200756	0.313167
271	PC(15:0/15:0)	175.482	706.536	1.0784	0.00861193	1.43057
272	1-(beta-D-Ribofuranosyl)-1,4-dihydronicotinamide	174.211	257.113	1.57098	4.71194e-05	0.0252967
273	4-O-alpha-D-Galactopyranuronosyl-D-galacturonic acid	485.056	353.074	1.24213	0.00200879	3.17464
274	3,3'-Dihydroxy-4',5,7-trimethoxyflavan	288.406	333.133	1.1361	0.0375435	0.331806
275	3-[(Cyanophenylmethyl)amino]-3-oxopropanoic acid	225.723	219.076	1.32057	0.00467631	0.353839
276	PC(20:4(5Z,8Z,11Z,14Z)/20:4(8Z,11Z,14Z,17Z))	162.81	830.567	1.51569	0.000788503	0.277727
277	Glycylprolylhydroxyproline	230.279	286.139	1.34352	0.0112634	30.4149
278	PC(P-18:1(11Z)/22:6(4Z,7Z,10Z,13Z,16Z,19Z))	159.555	816.588	1.21574	0.00361763	1.97415
279	Hexacosanoyl carnitine	189.745	540.499	1.37323	0.000993648	0.0425075
280	Demethylated antipyrine	49.4818	175.087	1.19546	0.0314639	0.450544
281	L-alpha-Amino-1H-pyrrole-1-hexanoic acid	253.526	197.128	1.51238	2.45619e-06	0.253885
282	5-Aminopentanamide	79.7763	117.102	1.37041	0.00225866	0.546199
283	PC(20:2(11Z,14Z)/15:0)	170.732	772.584	1.2341	0.00589119	0.679772
284	PC(14:0/P-18:0)	116.634	718.573	1.02819	0.0298355	32.9272
285	PC(22:0/22:5(4Z,7Z,10Z,13Z,16Z))	159.497	892.677	1.44695	0.00284518	3.02066
286	Glucosamine 6-phosphate	463.696	260.053	1.34163	2.0797e-05	0.154403
287	PC(20:3(8Z,11Z,14Z)/14:0)	171.904	756.551	1.17784	0.0108286	0.708078
288	3,4-Dihydro-2H-1-benzopyran-2-one	276.553	149.06	1.31411	0.000138711	0.447807
289	Threoninyl-Leucine	261.724	233.149	1.00983	0.0216627	2.18529
290	PC(22:5(7Z,10Z,13Z,16Z,19Z)/20:4(5Z,8Z,11Z,14Z))	160.599	856.582	1.38797	0.00015945	0.52953
291	Galactosylhydroxylysine	545.087	325.16	1.40566	0.000121117	0.334883
292	Lupiwighteone	258.127	339.121	1.31548	2.90823e-05	0.171219
293	LysoPC(18:1(9Z))	215.429	522.355	1.03617	0.0295906	0.66585
294	PC(14:1(9Z)/P-18:0)	168.702	716.557	1.25219	8.03719e-07	17.9225
295	2-Phenyl-4-pentenal	371.674	161.096	1.04996	0.000653644	0.514413
296	PC(24:1(15Z)/18:4(6Z,9Z,12Z,15Z))	161.875	864.645	1.50274	0.000351281	3.90743
297	PC(18:2(9Z,12Z)/15:0)	173.088	744.553	1.14001	0.0048183	0.599229
298	PC(22:6(4Z,7Z,10Z,13Z,16Z,19Z)/22:2(13Z,16Z))	37.5209	886.631	1.29622	0.000204809	3.03549
299	PC(20:5(5Z,8Z,11Z,14Z,17Z)/15:0)	167.583	766.536	1.55741	2.11464e-07	0.489727
300	PC(18:4(6Z,9Z,12Z,15Z)/18:2(9Z,12Z))	168.438	778.537	1.21416	0.0167039	0.671771
301	3alpha,4,7,7alpha-Tetrahydro-4-hydroxy-1H-isoindole-1,3(2H)-dione	86.5978	168.065	1.20886	0.00126025	0.432263
302	PS(18:0/22:6(4Z,7Z,10Z,13Z,16Z,19Z))	209.725	836.541	1.10272	0.00749254	1.59076
303	PA(8:0/8:0)	423.471	425.225	1.25486	0.0177058	0.114849
304	Glucoiberin	515.536	424.041	1.41563	0.00133426	0.373393
305	PC(24:1(15Z)/20:5(5Z,8Z,11Z,14Z,17Z))	160.521	890.661	1.44855	5.05596e-05	3.62961
306	Tetrahydro-2-methyl-3-thiophenethiol	244.097	135.03	1.12644	0.0493275	0.464814
307	PC(22:6(4Z,7Z,10Z,13Z,16Z,19Z)/20:4(5Z,8Z,11Z,14Z))	159.724	854.567	1.54732	0.000290944	0.205202
308	LysoPC(16:0)	218.961	496.339	1.15263	0.000951332	0.615339
309	Arginyl-Gamma-glutamate	462.123	303.177	1.21438	0.00401517	1.71216
310	Isoprothiolane	318.31	291.07	1.41635	0.00030422	0.26193
311	PC(20:1(11Z)/15:0)	169.853	774.6	1.07942	0.028441	1.39889
312	gamma-Carboxyglutamic acid	119.035	192.05	1.28584	0.0337316	2.7526
313	Methyl 4,6-di-O-galloyl-beta-D-glucopyranoside	393.491	499.111	1.07663	0.0111386	0.188993
314	Leucyl-Gamma-glutamate	303.305	260.16	1.12739	0.00408483	2.85229
315	1-Hexanol arabinosylglucoside	443.001	397.208	1.36647	0.00911137	0.347307
316	1-Isothiocyanato-7-(methylthio)heptane	268.767	204.087	1.2341	0.00368993	0.551216
317	1-Palmitoylglycerophosphoinositol	268.716	573.302	1.28294	2.11407e-05	0.324409
318	15-Acetoxyscirpene-3,4-diol 4-O-a-D-glucopyranoside	548.467	487.213	1.47872	0.00123985	0.176287
319	Acetyl-CoA	432.949	810.132	1.36561	0.00161511	0.319896
320	PS(22:6(4Z,7Z,10Z,13Z,16Z,19Z)/18:1(9Z))	210.867	834.526	1.1142	0.00165812	0.379018
321	PC(22:6(4Z,7Z,10Z,13Z,16Z,19Z)/22:5(4Z,7Z,10Z,13Z,16Z))	158.994	880.581	1.235	0.00365661	0.399918
322	Vinylacetylglycine	421.193	144.066	1.04804	0.0136797	0.532791
323	Cervonyl carnitine	196.536	472.341	1.53162	0.00088621	0.102188
324	LysoPC(18:3(6Z,9Z,12Z))	219.94	518.322	1.24232	0.000912606	0.656226
325	1,9-Nonanedithiol	151.631	193.108	1.45753	0.000702365	0.16069
326	PS(22:4(7Z,10Z,13Z,16Z)/15:0)	211.959	798.527	1.52345	0.00034281	0.285498
327	Semilepidinoside B	376.312	367.149	1.22428	0.00871789	4.66589
328	Sedoheptulose 1-phosphate	342.721	291.05	1.12086	0.0202327	0.664503
329	7-Aminomethyl-7-carbaguanine	233.677	180.088	1.30192	0.000959311	0.230532
330	LysoPC(22:6(4Z,7Z,10Z,13Z,16Z,19Z))	208.62	568.339	1.10875	0.0107238	0.580179
331	4-Aminohippuric acid	338.024	184.09	1.04908	0.0484532	0.346605
332	lysoPC(26:0)	206.371	636.496	1.3721	0.00248794	0.145322
333	Porphobilinogen	303.369	227.102	1.30746	0.00443954	0.437728
334	Acetylphosphate	475.515	140.995	1.3384	0.0135058	0.518805
335	3,3',4,4'-Tetrahydroxy-5,5'-diisopropyl-2,2'-dimethylbiphenyl	29.565	331.19	1.1414	0.00689631	0.503722
336	PS(16:0/22:4(7Z,10Z,13Z,16Z))	273.138	812.543	1.19057	0.00551257	0.578755
337	Brassicasterol	24.9826	381.351	1.38753	3.90663e-05	0.236201
338	Cytidine monophosphate	24.9635	324.061	1.16505	0.0416075	0.325122
339	Sinapine	272.261	310.164	1.38257	0.0138255	4.55128
340	Pyridoxine	27.2638	170.081	1.06397	0.000147013	4.65307
341	N2-Succinyl-L-ornithine	421.11	233.113	1.24841	0.0031339	0.423476
342	N-Acetyl-9-O-acetylneuraminic acid	341.558	352.123	1.18419	0.0153889	0.430665
343	S-Formylglutathione	407.443	336.087	1.26818	0.000661048	4.3503
344	3'-Hydroxyhexobarbital	473.202	253.118	1.51989	0.0100782	0.0867493
345	Ricinine	175.575	165.066	1.43684	0.000246955	0.444841
346	PE(22:5(4Z,7Z,10Z,13Z,16Z)/14:0)	169.815	738.506	1.38461	0.000867705	0.501219
347	3-Dehydroquinate	199.451	191.053	1.29993	0.00160212	0.453489
348	PE(P-18:1(11Z)/18:4(6Z,9Z,12Z,15Z))	165.121	722.51	1.30187	0.00602676	0.466023
349	3,4-Dihydro-6-hydroxy-2,5,7,8-tetramethyl-2H-1-benzopyran-2-carboxylic acid	29.5316	251.128	1.17709	0.00454423	0.518383
350	PE(16:0/18:3(9Z,12Z,15Z))	174.289	714.506	1.35622	0.00582186	0.404714
351	7C-aglycone	23.8261	299.127	1.32731	0.000176256	0.121256
352	Cochliophilin A	349.705	283.062	1.3139	0.00317191	0.356173
353	Pipericine	32.9742	336.326	1.12109	0.00691137	0.629039
354	PS(18:0/18:4(6Z,9Z,12Z,15Z))	212.012	784.511	1.54375	2.03578e-07	0.219799
355	PS(20:0/20:4(5Z,8Z,11Z,14Z))	210.857	840.573	1.45437	0.000165378	2.89051
356	Serylthreonine	116.598	207.097	1.11501	0.0163505	2.07279
357	PE(P-18:1(9Z)/16:1(9Z))	169.661	700.526	1.36423	0.00067165	0.577379
358	Neolinustatin	406.389	446.159	1.2236	0.000925613	3.20102
359	Ethylphosphate	275.81	183.076	1.46525	0.0043821	0.186301
360	PE(20:5(5Z,8Z,11Z,14Z,17Z)/18:1(11Z))	38.6466	764.52	1.23536	5.35726e-05	0.278452
361	S-Phenylmercapturic acid	30.7066	240.071	1.21582	0.00353283	0.416835
362	9-(beta-D-Ribofuranosyl)zeatin	232.53	352.161	1.564	1.05393e-09	0.218407
363	PC(18:4(6Z,9Z,12Z,15Z)/15:0)	169.807	740.521	1.56921	1.71823e-08	0.379575
364	Amlaic acid	467.174	653.112	1.23718	0.00417771	0.300565
365	Alantolactone	442.981	255.134	1.43801	3.77452e-05	0.100094
